# Supplementary material for: Nurse-Led Interventions in Chronic Obstructive Pulmonary Disease Patients: A Systematic Review and Meta-Analysis
Source: MDPI journal article supplement (doi:10.3390/ijerph19159101), 2022-07-26
Supplement: s1 [file s1]

**Table S1.** Characteristics of studies focusing on nurse-led COPD interventions.

| Study                         | Country     | Period                | N.                      | Design                                                                   | Population                                                                   | Intervention vs comparison                                                                                                                                                                                                                                                         | Outcome variables                                                                                                                                                                                                                                                                                                                                                                                                                                                                                                                                                                                                                           |
|-------------------------------|-------------|-----------------------|-------------------------|--------------------------------------------------------------------------|------------------------------------------------------------------------------|------------------------------------------------------------------------------------------------------------------------------------------------------------------------------------------------------------------------------------------------------------------------------------|---------------------------------------------------------------------------------------------------------------------------------------------------------------------------------------------------------------------------------------------------------------------------------------------------------------------------------------------------------------------------------------------------------------------------------------------------------------------------------------------------------------------------------------------------------------------------------------------------------------------------------------------|
| <b>Abad Corpa et al. 2013</b> | Spain       | 24 weeks              | 143<br>GI: 56<br>GC: 87 | Quasi-experimental study with a control group, pseudo-random by services | - Patients admitted with a main diagnosis of COPD greater than 18 months.    | - Home visits by hospital and primary care nurse coordinated in a team with telephone calls + extra intervention<br>- Hospital evaluation knowledge about COPD and individualized care plan of relative and patient for 5 days vs.<br>- Telephone calls without extra intervention | - Level of satisfaction with nursing care: LOPSS12.<br>- Use of health service after discharge<br>- N. of days admitted after discharge<br>- Assessment health status: Apache II Severity Index<br>- Medication compliance: Morinsky–Green test<br>- Social situation: Gijón scale.<br>- Knowledge therapeutic regimen: Nursing Outcomes Classification (NOC)<br>- Cognitive state: Mini mental.<br>- Severity level: severity index.<br>- Physical disability scale: from Red Cross.<br>- Fragility index of: Katz<br>- Quality of life: SGRQ<br>- Quality of life: MRC, CAT, EQ 5D, PHQ 9<br>- Satisfaction with inhaler use:<br>- ISF-10 |
| <b>Ahn et al. 2020</b>        | South Korea | 6 months<br>2018-2019 | 261                     | Prospective cohort study                                                 | - Age >40 years.<br>- Diagnosis of COPD with minimum inhaler use for 1 month | - 3 visits in 6 months after discharge by a nurse specialized in inhalation therapy                                                                                                                                                                                                | - Satisfaction with inhaler use:<br>- ISF-10                                                                                                                                                                                                                                                                                                                                                                                                                                                                                                                                                                                                |

|                       |        |                              |                      |                                          |                                                                                                                                                                                                                                                                                                                                                                                                                                                            |                                                                                                                                                                                                                                  |                                                                                                                                                                                                                                                                                                                                                                                                                                                                                           |
|-----------------------|--------|------------------------------|----------------------|------------------------------------------|------------------------------------------------------------------------------------------------------------------------------------------------------------------------------------------------------------------------------------------------------------------------------------------------------------------------------------------------------------------------------------------------------------------------------------------------------------|----------------------------------------------------------------------------------------------------------------------------------------------------------------------------------------------------------------------------------|-------------------------------------------------------------------------------------------------------------------------------------------------------------------------------------------------------------------------------------------------------------------------------------------------------------------------------------------------------------------------------------------------------------------------------------------------------------------------------------------|
| Akinci et al.<br>2011 | Turkey | 3<br>months<br>2005-<br>2007 | 32<br>GI:16<br>GC:16 | RCT<br>Randomized<br>controlled<br>trial | <ul style="list-style-type: none"><li>- GOLD III, IV.</li><li>- No history of infections or exacerbation of respiratory symptoms.</li><li>- No medication changes preceding 2 months.</li><li>- No myocardial infarctions preceding 4 months.</li><li>- No serious congestive heart disease</li><li>- No serious problems of hypertension, diabetes mellitus</li><li>- With complications and muscle and joint problems.</li><li>- GOLD III, IV.</li></ul> | to train, educate<br>and clarify patient's<br>doubts.                                                                                                                                                                            |                                                                                                                                                                                                                                                                                                                                                                                                                                                                                           |
|                       |        |                              |                      |                                          |                                                                                                                                                                                                                                                                                                                                                                                                                                                            | vs.<br><ul style="list-style-type: none"><li>- Usual therapy</li><li>- Efficacy of nurse-led home pulmonary rehabilitation</li></ul> vs.<br><ul style="list-style-type: none"><li>- Absence of rehabilitation program.</li></ul> | -Pulmonary function: <ul style="list-style-type: none"><li>- Forced expiratory volume in First second (FEV1 % predictive-value)</li><li>- FEV1 /FVC.</li><li>- Arterial blood gases:<ul style="list-style-type: none"><li>- ABL 700 series.</li><li>- American Thoracic Society's criteria.</li></ul></li><li>- Quality of life (SGRQ).</li><li>- Dyspnea level: BDI.</li><li>- Functional capacity:<ul style="list-style-type: none"><li>- 6-minute walk test (6MWT)</li></ul></li></ul> |

|                                |           |                         |     |                                       |                                                                                                                                                                                                                                                                                                           |                                                                                                                                                                                                                                                                                                                                                                                                                            |                                                                                                                                                                                                                                                                                                                                                       |
|--------------------------------|-----------|-------------------------|-----|---------------------------------------|-----------------------------------------------------------------------------------------------------------------------------------------------------------------------------------------------------------------------------------------------------------------------------------------------------------|----------------------------------------------------------------------------------------------------------------------------------------------------------------------------------------------------------------------------------------------------------------------------------------------------------------------------------------------------------------------------------------------------------------------------|-------------------------------------------------------------------------------------------------------------------------------------------------------------------------------------------------------------------------------------------------------------------------------------------------------------------------------------------------------|
| <b>Al-Kalaldeh et al. 2016</b> | Jordan    | 8 months<br>2015        | 121 | Quasi-experimental study              | <ul style="list-style-type: none"> <li>- Age &gt; 18 years.</li> <li>- Diagnosed COPD &gt; 2 years with inhaler &gt; 6 months.</li> <li>- Exclusion: <ul style="list-style-type: none"> <li>- Lung disorders other than COPD.</li> <li>- Dementia, psychosis, or profound deafness</li> </ul> </li> </ul> | <ul style="list-style-type: none"> <li>- Health education about inhalers: <ul style="list-style-type: none"> <li>- Purposes, action and adverse effects.</li> <li>- Assessment of correct use of Inhaler.</li> </ul> </li> </ul>                                                                                                                                                                                           | <ul style="list-style-type: none"> <li>- Knowledge inhalers: <ul style="list-style-type: none"> <li>- Inhaler Proficiency Schedule (IPS).</li> <li>- Behavior before use of Inhaler: <ul style="list-style-type: none"> <li>- Patient Reported Behavior (PRB)</li> </ul> </li> </ul> </li> </ul>                                                      |
| <b>Ansari et al. 2020</b>      | Australia | 1 1/2 year<br>2015-2016 | 44  | Experimental study of a single group. | <ul style="list-style-type: none"> <li>- Patients with COPD.</li> <li>- Age 40 &lt; 84 years.</li> <li>- At least one other chronic condition or coexisting comorbidity.</li> <li>- No cognitive impairment.</li> <li>- Knowledge of English language.</li> </ul>                                         | <ul style="list-style-type: none"> <li>- Patients with COPD activated through personalized self-care support that recognizes implications of comorbidities, generating: <ul style="list-style-type: none"> <li>- Improved health behavior regarding COPD.</li> <li>- Improve knowledge and self-management of COPD.</li> <li>- Increased self-efficacy in empowerment in general health management.</li> </ul> </li> </ul> | <ul style="list-style-type: none"> <li>- Perception of multimorbidity burden: Multimorbidity Illness Perceptions Scale (MULTIPLES).</li> <li>- Patient Activation: Patient Activation Measure (PAM 13).</li> <li>- Impact of COPD on patient's life: - COPD Assessment Test (CAT); COPD Knowledge: - COPD Knowledge Questionnaire (COPDQ).</li> </ul> |

|                                 |                |                        |                         |                             |                                                                                                                                                                                                                                |                                                                                                                                                                                                                                                                                                                                          |                                                                                                                                                                                                     |
|---------------------------------|----------------|------------------------|-------------------------|-----------------------------|--------------------------------------------------------------------------------------------------------------------------------------------------------------------------------------------------------------------------------|------------------------------------------------------------------------------------------------------------------------------------------------------------------------------------------------------------------------------------------------------------------------------------------------------------------------------------------|-----------------------------------------------------------------------------------------------------------------------------------------------------------------------------------------------------|
| <b>Bal Özkaptan et al. 2016</b> | Turkey         | 12 months<br>2012-2013 | 106<br>GI:53<br>GC:53   | Randomized clinical trial   | <ul style="list-style-type: none"> <li>- Patients with COPD for at least 1 year.</li> <li>- No difficulty communicating.</li> <li>- No disease except diseases related to COPD.</li> <li>- Resident in city center.</li> </ul> | <ul style="list-style-type: none"> <li>- Home nursing care with self-efficacy self-care model of patients with COPD</li> <li>- Guidelines given on first visit, then 4 visits in 3 months vs.</li> <li>- Home nursing care with self-efficacy self-care model of patients with COPD,</li> <li>- Guidelines given during visit</li> </ul> | <ul style="list-style-type: none"> <li>- Dyspnea:</li> <li>- MRC</li> <li>- COPD self-sufficiency:</li> <li>- COPD Self-efficacy scale</li> <li>- CSES</li> </ul>                                   |
| <b>Benzo et al. 2019 (7)</b>    | USA            | 12 months              | 215<br>GI:108<br>GC:107 | Randomized controlled trial | <ul style="list-style-type: none"> <li>- COPD patients</li> <li>- Ability to communicate by phone</li> </ul>                                                                                                                   | <ul style="list-style-type: none"> <li>- Post-discharge nurse training with home visits and phone calls</li> </ul>                                                                                                                                                                                                                       | <ul style="list-style-type: none"> <li>- N. hospitalizations</li> <li>- No. of deaths from COPD</li> <li>- Quality of life (SGRQ).</li> </ul>                                                       |
| <b>Billington et al. 2014</b>   | United Kingdom | 12 weeks               | 71<br>GI: 34<br>GC: 37  | Randomized controlled trial | <ul style="list-style-type: none"> <li>- Patients with COPD</li> <li>- Previous spirometry results of FEV1/FVC ratio of 70% or less.</li> <li>- Knowing how to read and speak English.</li> </ul>                              | <ul style="list-style-type: none"> <li>- Plan with telephone nursing support (intervention) vs.</li> <li>- Self-care plan only (usual care)</li> </ul>                                                                                                                                                                                   | <ul style="list-style-type: none"> <li>- Impact of COPD on quality of life:</li> <li>- CAT</li> <li>- Number of exacerbations</li> <li>- Service satisfaction</li> <li>- Hospital visits</li> </ul> |

|                                   |           |                        |                                |                                                |                                                                                                                                                                                                                                                                                                                                                                                                                           |                                                                                                                                                         |                                                                                                                                                                                                                                                                                                         |
|-----------------------------------|-----------|------------------------|--------------------------------|------------------------------------------------|---------------------------------------------------------------------------------------------------------------------------------------------------------------------------------------------------------------------------------------------------------------------------------------------------------------------------------------------------------------------------------------------------------------------------|---------------------------------------------------------------------------------------------------------------------------------------------------------|---------------------------------------------------------------------------------------------------------------------------------------------------------------------------------------------------------------------------------------------------------------------------------------------------------|
| <b>Bischoff et al. 2012</b>       | Holland   | 24 months<br>2004-2006 | 165<br>GI:55<br>GC:55<br>Gx:55 | RCT<br>Randomized controlled trial             | <ul style="list-style-type: none"> <li>- Patients with COPD.</li> <li>- Age &gt; 35 years.</li> <li>- FVC &lt; 0.7.</li> <li>- Exclusion</li> <li>- FEV1 &lt;30%</li> <li>- Therapy with a respiratory doctor</li> <li>- With serious comorbid conditions</li> <li>- Reduced life expectancy</li> <li>- Inability to communicate in Dutch</li> <li>- Objections to mode of management of disease used in study</li> </ul> | <ul style="list-style-type: none"> <li>- Usual care + self-management vs.</li> <li>- Usual care + routine monitoring by a primary care nurse</li> </ul> | <ul style="list-style-type: none"> <li>- Frequency and management of exacerbations</li> <li>- Exacerbation assessment telephone system. (TEXAS).</li> <li>- Dyspnea level: MRC.</li> <li>- Quality of life assessment of people with COPD: CRQ.</li> <li>- COPD self-sufficiency scale: CSES</li> </ul> |
| <b>Cai et al. 2020 (10)</b>       | China     | 12 months<br>2018      | 120<br>GI: 60<br>GC: 60        | Retrospective study                            | <ul style="list-style-type: none"> <li>- Patients with moderate COPD.</li> <li>- FEV1/FVC &lt;70%</li> <li>- 50% &lt; FEV1 &lt; 80%</li> </ul>                                                                                                                                                                                                                                                                            | <ul style="list-style-type: none"> <li>- Bi-directional quality feedback nursing model vs.</li> <li>- Conventional nursing intervention</li> </ul>      | <ul style="list-style-type: none"> <li>- Quality of life:</li> <li>- World Health Organization</li> <li>- Quality of Life Scale Abbreviated</li> <li>- Version WHOQOL-BREF.</li> </ul>                                                                                                                  |
| <b>Cameron-Tucker et al. 2016</b> | Australia | 8- 12 weeks            | 65<br>GI: 35<br>GC: 30         | Randomized clinical trial with parallel groups | <ul style="list-style-type: none"> <li>- Patients with COPD.</li> <li>- Age &gt; 18 years.</li> <li>- Present an exacerbation at least 2 months before data collection.</li> <li>- Excludes cognitive impairment</li> </ul>                                                                                                                                                                                               | <ul style="list-style-type: none"> <li>- Tele-rehabilitation vs.</li> <li>- Usual care</li> </ul>                                                       | <ul style="list-style-type: none"> <li>- Physical capacity: 6MWD.</li> <li>- Impact of COPD on quality of life:</li> <li>- CAT</li> <li>- Health Behavior: SNAPPS</li> </ul>                                                                                                                            |

|                             |           |              |                        |                                                    |                                                                                                                                                                                                                                                                                                                                                               |                                                                                                                                                                 |                                                                                                                                                                                                                                                                  |
|-----------------------------|-----------|--------------|------------------------|----------------------------------------------------|---------------------------------------------------------------------------------------------------------------------------------------------------------------------------------------------------------------------------------------------------------------------------------------------------------------------------------------------------------------|-----------------------------------------------------------------------------------------------------------------------------------------------------------------|------------------------------------------------------------------------------------------------------------------------------------------------------------------------------------------------------------------------------------------------------------------|
| <b>Chau et al.<br/>2012</b> | China     | 2<br>months  | 40<br>GI:22<br>GC:18   | Randomized<br>unblinded<br>parallel<br>group study | <ul style="list-style-type: none"> <li>- Age &gt; 60 years.</li> <li>- Patients with moderate or severe COPD.</li> <li>- Patients admitted to hospital at least once due to exacerbation during previous year.</li> <li>- Excluding those with cognitive impairment, illiterate or unable to use tele-assistance technological instrument</li> </ul>          | <ul style="list-style-type: none"> <li>- Use of telecare system with community nurse and.</li> <li>- Usual care</li> </ul>                                      | <ul style="list-style-type: none"> <li>- Satisfaction questionnaire.</li> <li>- Quality of life assessment of people with COPD: CRQ.</li> <li>- Lung function: FEV1 and FVC.</li> <li>- Access to emergency service</li> <li>- Or hospital admissions</li> </ul> |
| <b>Cumming et al. 2010</b>  | Australia | 12<br>months | 36<br>GI: 17<br>GC: 19 | RCT<br>Randomized<br>controlled<br>trial           | <ul style="list-style-type: none"> <li>- Patient with COPD.</li> <li>- Age &gt; 45 years.</li> <li>- Patients with at least one exacerbation during previous year.</li> <li>- Mini-mental scale &gt; 21</li> <li>- No palliative patient or with other respiratory diseases</li> <li>- Owning a telephone</li> <li>- Able to give informed consent</li> </ul> | <ul style="list-style-type: none"> <li>- Use of electronic monitoring techniques and tutoring by community nurses</li> <li>vs.</li> <li>- Usual care</li> </ul> | <ul style="list-style-type: none"> <li>- Use of monitoring diary.</li> <li>- Hospital admissions.</li> <li>- Stanford Chronic Disease Management Scale</li> </ul>                                                                                                |

|                                  |           |                       |                        |                                    |                                                                                                                                                                                                                                                                                                                           |                                                                                                                                                                                                                                                                   |                                                                                                                                                                                                                                         |
|----------------------------------|-----------|-----------------------|------------------------|------------------------------------|---------------------------------------------------------------------------------------------------------------------------------------------------------------------------------------------------------------------------------------------------------------------------------------------------------------------------|-------------------------------------------------------------------------------------------------------------------------------------------------------------------------------------------------------------------------------------------------------------------|-----------------------------------------------------------------------------------------------------------------------------------------------------------------------------------------------------------------------------------------|
| <b>De San Miguel et al. 2013</b> | Australia | 6 months              | 71<br>GI:36<br>GC:35   | RCT<br>Randomized controlled trial | <ul style="list-style-type: none"> <li>- Patients with COPD.</li> <li>- Patients with O2 at home.</li> <li>- Speaking English.</li> </ul> <p>Exclusion:</p> <ul style="list-style-type: none"> <li>- Patients with dementia</li> <li>- Palliative care</li> <li>- No telephone</li> <li>- Cognitive impairment</li> </ul> | <ul style="list-style-type: none"> <li>- Remote monitoring of vital parameters with a telemedicine team assisted by a nurse.</li> </ul> <p>vs</p> <ul style="list-style-type: none"> <li>- Nursing assistance data collection of vital parameters only</li> </ul> | <ul style="list-style-type: none"> <li>- N. visits to general practitioner</li> <li>- N. specialist medical visit</li> <li>- N. access to Emergency Department</li> <li>- N. hospital admissions</li> <li>- N. days admitted</li> </ul> |
| <b>Deng et al. 2013</b>          | China     | 6 months<br>2010-2011 | 64<br>GI:32<br>GC:32   | RCT<br>Randomized controlled trial | <ul style="list-style-type: none"> <li>- Patients with COPD.</li> <li>- FEV1: 60-25% post bronchodilator</li> <li>- Speaking Mandarin</li> </ul> <p>Exclusion.</p> <ul style="list-style-type: none"> <li>- Severe disability caused by other diseases</li> </ul>                                                         | <ul style="list-style-type: none"> <li>- Non-pharmacological therapy to better manage dyspnea by a nurse:</li> </ul> <p>psychological, cognitive-behavioral, physical-functional</p> <p>vs</p> <ul style="list-style-type: none"> <li>- Usual therapy</li> </ul>  | <ul style="list-style-type: none"> <li>- Dyspnea level:</li> <li>- MRC.</li> <li>- MFI-20</li> </ul>                                                                                                                                    |
| <b>Doğan et al. 2017</b>         | Turkey    | 5 months<br>2015      | 63<br>GI: 32<br>GC: 31 | Quasi-experimental study           | <ul style="list-style-type: none"> <li>- Patients with COPD.</li> <li>- Patients &gt; 18 years old.</li> <li>- Patients with prescription of oxygen concentrator with ATS and ERS criteria.</li> </ul>                                                                                                                    | <ul style="list-style-type: none"> <li>- Health education given by nurses to COPD patients on daily use of oxygen concentrator</li> </ul> <p>vs.</p> <ul style="list-style-type: none"> <li>- Absence of this training</li> </ul>                                 | <ul style="list-style-type: none"> <li>- Spirometry.</li> <li>- SaO2</li> <li>- pH</li> <li>- PaO2</li> <li>- FEV1</li> <li>- N. exacerbations in 3 months</li> <li>- N. hospitalizations in 3 months.</li> </ul>                       |

- Level of satisfaction in use of O2 concentrator

|                          |                |                    |              |                    |                                                                                                                                                                                                                                                                                                                    |                                                                                                                                                                                                                                                                                                                                 |                                                                                                                                                                                                                                                                               |
|--------------------------|----------------|--------------------|--------------|--------------------|--------------------------------------------------------------------------------------------------------------------------------------------------------------------------------------------------------------------------------------------------------------------------------------------------------------------|---------------------------------------------------------------------------------------------------------------------------------------------------------------------------------------------------------------------------------------------------------------------------------------------------------------------------------|-------------------------------------------------------------------------------------------------------------------------------------------------------------------------------------------------------------------------------------------------------------------------------|
| <b>Early et al. 2017</b> | United Kingdom | 9 months 2012-2013 | 14 G1:8 G2:6 | Case control study | <ul style="list-style-type: none"> <li>- Patients with COPD</li> <li>- FEV1 &lt; 50%</li> <li>- FVC &lt; 0.7</li> <li>- GOLD III, IV</li> <li>- 2 COPD exacerbations related to hospital admissions in last year.</li> <li>- Age &gt;18 years</li> <li>- Without pulmonary rehabilitation in last year.</li> </ul> | <ul style="list-style-type: none"> <li>- Internet-based standard program, TPP and support from nurse advisers (Group 1 focused on getting fit and staying out of hospital) vs.</li> <li>- Internet-based standard program, TPP and nurse-advisor support (focused on daily activities and slowing COPD progression).</li> </ul> | <ul style="list-style-type: none"> <li>- Assessment of quality of life for People with COPD:</li> <li>- CRQ.</li> <li>- Hospital Anxiety and Depression Scale: HADS.</li> <li>- Need for patient information:</li> <li>- Lung Information Needs Questionnaire LINQ</li> </ul> |
|--------------------------|----------------|--------------------|--------------|--------------------|--------------------------------------------------------------------------------------------------------------------------------------------------------------------------------------------------------------------------------------------------------------------------------------------------------------------|---------------------------------------------------------------------------------------------------------------------------------------------------------------------------------------------------------------------------------------------------------------------------------------------------------------------------------|-------------------------------------------------------------------------------------------------------------------------------------------------------------------------------------------------------------------------------------------------------------------------------|



|                                    |                |                        |                         |                                        |                                                                                                                                                                                                                                                   |                                                                                                                                                           |                                                                                                                                                                                                                                               |
|------------------------------------|----------------|------------------------|-------------------------|----------------------------------------|---------------------------------------------------------------------------------------------------------------------------------------------------------------------------------------------------------------------------------------------------|-----------------------------------------------------------------------------------------------------------------------------------------------------------|-----------------------------------------------------------------------------------------------------------------------------------------------------------------------------------------------------------------------------------------------|
| <b>Efil et al. 2020</b>            | Turkey         | 12 months<br>2016-2017 | 59<br>GI:29<br>GC:30    | Case control study                     | <ul style="list-style-type: none"> <li>- Patients with COPD.</li> <li>- Use of inhalers for at least 6 months.</li> <li>- GOLD II, III Exclusive</li> <li>- Patients with deafness, blindness or alcohol or drug dependence</li> </ul>            | <ul style="list-style-type: none"> <li>- Inhaler training (oral explanation and a demonstration) vs.</li> <li>- Lack of training on inhalers</li> </ul>   | <ul style="list-style-type: none"> <li>- Medication adherence: Morisky Medication Adherence Scale (MMAS-8).</li> <li>- Quality of life (SGRQ).</li> <li>- Impact of COPD on quality of life: CAT</li> <li>- FEV1</li> </ul>                   |
| <b>Heslop-Marshall et al. 2018</b> | United Kingdom | 12 months              | 236<br>GI:115<br>GC:121 | Randomized controlled trial            | <ul style="list-style-type: none"> <li>- Patients with COPD FEV1/FVC &lt; 70%</li> <li>- Patients with HADS – anxiety subscale scores of 8. ≥</li> <li>- Agree to attend a minimum of two and a maximum of six CBT sessions. (Therapy)</li> </ul> | <ul style="list-style-type: none"> <li>- Cognitive behavioral therapy vs.</li> <li>- Regular intervention</li> </ul>                                      | <ul style="list-style-type: none"> <li>- Quality of life related to health: EQ5D</li> <li>- Anxiety and depression scale: HADS</li> </ul>                                                                                                     |
| <b>Iniesta Sánchez et al. 2016</b> | Spain          | 24 weeks<br>2007-2008  | 143<br>GI:56<br>GC:87   | Quasi-experimental study pseudo random | <ul style="list-style-type: none"> <li>- Patients with COPD</li> </ul>                                                                                                                                                                            | <ul style="list-style-type: none"> <li>- Care plan with taxonomies vs</li> <li>- Regular hospital care.</li> </ul>                                        | <ul style="list-style-type: none"> <li>- Evaluation and evolution of NOC</li> <li>- Knowledge of therapeutic regimen</li> </ul>                                                                                                               |
| <b>Ingadottir et al. 2010</b>      | Iceland        | 18 months<br>2006-2008 | 42                      | Pre-post intervention study.           | <ul style="list-style-type: none"> <li>- GOLD II, III, IV</li> <li>- Hospitalized in last few months.</li> <li>- Important change in health before and after hospitalization.</li> </ul>                                                          | <ul style="list-style-type: none"> <li>- Nursing intervention based on helping and improving life of patients with COPD and their families vs.</li> </ul> | <ul style="list-style-type: none"> <li>- SGRQ quality of life.</li> <li>- HADS Hospital Anxiety and Depression Scale.</li> <li>- Body mass index BMI</li> <li>- N. Hospital admissions</li> <li>- Ability to use inhaler correctly</li> </ul> |

|                                 |                |                     |                         |                             |                                                                                                                                      |                                                                                                                                                                                                                  |                                                                                                                                                                                                                                                      |
|---------------------------------|----------------|---------------------|-------------------------|-----------------------------|--------------------------------------------------------------------------------------------------------------------------------------|------------------------------------------------------------------------------------------------------------------------------------------------------------------------------------------------------------------|------------------------------------------------------------------------------------------------------------------------------------------------------------------------------------------------------------------------------------------------------|
|                                 |                |                     |                         |                             | - Be autonomous at home                                                                                                              | - Regular intervention                                                                                                                                                                                           |                                                                                                                                                                                                                                                      |
| <b>Jolly et al. 2018</b>        | United Kingdom | 12 months           | 516<br>GI:239<br>CI:277 | Randomized controlled trial | - COPD patients<br>- MRC 1/2 scale in primary care                                                                                   | - Telephone intervention of health training given by nurses:<br>- Smoking cessation.<br>- Increase physical activity<br>- Pharmacological management<br>- Action planning<br>vs.<br>- Intervention usually alone | - Quality of life (SGRQ).<br>- EQ- 5D-5L<br>- HADS anxiety<br>- HADS depression<br>- MRC dyspnea<br>- Hospital admissions<br>- Access to Emergency service<br>- Access to primary care service<br>- Smoking cessation<br>- IQR therapeutic adherence |
| <b>Jurado Gámez et al. 2012</b> | Spain          | 1 year<br>2010-2011 | 71<br>GI:36<br>GC:35    | Randomized controlled trial | - Patients with COPD<br>- Age < 75 years<br>- Belonging to study health area<br>Excluded:<br>- Severe comorbidity<br>- No phone line | - Nursing home visit 48-72 hours after hospital discharge<br>vs.<br>- Usual care                                                                                                                                 | - Arterial blood gases<br>- FEV1<br>- Borg scale<br>- Charlson index<br>- N. hospital admissions                                                                                                                                                     |

|                               |         |                        |                        |                                   |                                                                                                                                                                                                                                                                                                                                        |                                                                                                                                                                                                   |                                                                                                                                                                           |
|-------------------------------|---------|------------------------|------------------------|-----------------------------------|----------------------------------------------------------------------------------------------------------------------------------------------------------------------------------------------------------------------------------------------------------------------------------------------------------------------------------------|---------------------------------------------------------------------------------------------------------------------------------------------------------------------------------------------------|---------------------------------------------------------------------------------------------------------------------------------------------------------------------------|
| <b>Karasu et al. 2020</b>     | Turkey  | 8 months<br>2017       | 160<br>GI: 80<br>GC:80 | Randomized<br>controlled<br>trial | <ul style="list-style-type: none"> <li>- Diagnosed COPD for at least 6 months or more.</li> <li>- No communication problems.</li> </ul>                                                                                                                                                                                                | <ul style="list-style-type: none"> <li>-Home care following Health Promotion Model + interventions according to demands</li> <li>vs.</li> <li>-No additional nursing care</li> </ul>              | <ul style="list-style-type: none"> <li>- ASA scale (self-care)</li> <li>- Life Attitude Profile (LAP)</li> </ul>                                                          |
| <b>Khoshkesht et al. 2015</b> | Iran    | 3 months<br>2010-2011  | 66<br>GI:34<br>GI:32   | Randomized<br>controlled<br>trial | <ul style="list-style-type: none"> <li>- Patients &gt; 65 years.</li> <li>- Patients with moderate or severe COPD.</li> <li>- Not participating in any respiratory exercise group in previous year.</li> <li>- Excludes cognitive, cardiological and musculoskeletal impairment.</li> <li>- Able to read and write Persian.</li> </ul> | <ul style="list-style-type: none"> <li>- Pulmonary rehabilitation applying Bandura technique self-efficacy theory</li> <li>vs</li> <li>- Routine nurse visits with weekly phone calls.</li> </ul> | <ul style="list-style-type: none"> <li>- CSES self-efficacy scale</li> </ul>                                                                                              |
| <b>Lamers et al. 2010</b>     | Holland | 20 months<br>2003-2005 | 119<br>GI:58<br>GC:61  | Randomized<br>controlled<br>trial | <ul style="list-style-type: none"> <li>- Patients &gt; 60 years.</li> <li>- Patients with COPD or emphysema or chronic bronchitis</li> <li>- Excludes major depression</li> </ul>                                                                                                                                                      | <ul style="list-style-type: none"> <li>- Nursing management of the (MPI) minimal psychological intervention</li> <li>vs</li> <li>- Standard nursing treatment</li> </ul>                          | <ul style="list-style-type: none"> <li>- BDI (Beck Depression Inventory).</li> <li>- SCL (Symptom Checklist-90)</li> <li>- SGRQ (Saint George Quality of Life)</li> </ul> |

|                            |             |                                 |                        |                             |                                                                                                                                                            |                                                                                      |                                                                                                                                                                                   |
|----------------------------|-------------|---------------------------------|------------------------|-----------------------------|------------------------------------------------------------------------------------------------------------------------------------------------------------|--------------------------------------------------------------------------------------|-----------------------------------------------------------------------------------------------------------------------------------------------------------------------------------|
| <b>Lavesen et al. 2016</b> | Denmark     | 1 year<br>6 months<br>2010-2012 | 178<br>GI:101<br>GC:77 | Randomized controlled trial | COPD patients with acute pneumonia Exacerbation.<br>Excluded:<br>- Cognitive impairment, dementia.<br>- Deafness.<br>- Not speaking Danish.                | - Phone follow-up by a nurse to empower patient vs<br>- Usual treatment              | - Mortality rate.<br>- Patient assessment of COPD Management (%)                                                                                                                  |
| <b>Lee et al. 2015</b>     | South Korea | 6 months<br>2010-2011           | 151<br>GI:78<br>GC:73  | Randomized controlled trial | - Patient with COPD<br>- Age 40-80 years<br>- Life expectancy > 6 months                                                                                   | - Nurse-led problem-solving therapy vs.<br>- Usual care                              | - EPOC Self-Efficacy Scale (CSES).<br>- Jalowiec Coping Scale (JCS)<br>- Depressive symptoms (CES-D Radloff)                                                                      |
| <b>Li et al. 2014</b>      | China       | 6 months<br>2008-2009           | 112<br>GI: 56<br>GC:56 | Case control study          | - Patients diagnosed with COPD.<br>- FEV1/FVC < 70%<br>- FEV1% < 80%<br>- Capacity for self-care during established period                                 | - Usual care + 3 months follow-up vs.<br>- Usual care                                | - Quality of life: Saint George respiratory questionnaire (SGRQ)<br>- Anxiety, depression: Goldberg's General Health Questionnaire (GHQ-28)<br>- Body Mass Index (BMI)            |
| <b>Li et al. 2015</b>      | China       | 19 months<br>2012-2013          | 61<br>GI:31<br>GC:30   | Randomized controlled trial | - Patients with COPD<br>- FEV1 / FVC < 70%<br>- No change in preceding 4 weeks of pharmacological or symptomatic therapy<br>- Ability to speak Mandarin or | - Education in management of disease by an expert hospital nurse. vs<br>- Usual care | - Quality of life:<br>- Seattle Obstructive Lung Disease Questionnaire<br>- COPD Self Efficacy Scale<br>- Frequency of exacerbations<br>- Frequency of emergency hospitalizations |

|                              |       |                  |                      |                             |                                                                                                                                                                                                                                                                                                                                                                         |                                                                                                                                                                                      |                                                                                                                                                                                                              |
|------------------------------|-------|------------------|----------------------|-----------------------------|-------------------------------------------------------------------------------------------------------------------------------------------------------------------------------------------------------------------------------------------------------------------------------------------------------------------------------------------------------------------------|--------------------------------------------------------------------------------------------------------------------------------------------------------------------------------------|--------------------------------------------------------------------------------------------------------------------------------------------------------------------------------------------------------------|
|                              |       |                  |                      |                             | Cantonese<br>- Ability to use mobile phone.                                                                                                                                                                                                                                                                                                                             |                                                                                                                                                                                      |                                                                                                                                                                                                              |
| <b>Li et al. 2020</b>        | China | 4 months<br>2017 | 70<br>GI:35<br>GC:35 | Randomized controlled trial | <ul style="list-style-type: none"> <li>- Patients with COPD.</li> <li>- GOLD I, II, III or IV</li> <li>- Exposure to risk factors of different types</li> <li>- FEV1/ FVC &lt; 70%</li> <li>- Ability to communicate in Chinese.</li> <li>- Capable of completing questionnaires and participating in interviews.</li> <li>- Access to use of a mobile phone</li> </ul> | <ul style="list-style-type: none"> <li>- Nursing care based on Information theory,</li> <li>- Knowledge, Attitude and Practice IKAP vs.</li> <li>- Standard nursing care.</li> </ul> | <ul style="list-style-type: none"> <li>- Quality of life:</li> <li>- Saint George Respiratory Questionnaire (SGRQ)</li> </ul>                                                                                |
| <b>Mohammadi et al. 2015</b> | Iran  | 4 months         | 40<br>GI:20<br>GC:20 | Control case study          | <ul style="list-style-type: none"> <li>- Patients with COPD.</li> <li>- GOLD II, III</li> <li>- Not having other chronic diseases.</li> <li>- No use of oxygen when performing daily activities</li> <li>- No use of tranquilizers or antidepressants.</li> </ul>                                                                                                       | <ul style="list-style-type: none"> <li>- Home rehabilitation of three x one-hour sessions of individual face-to-face training vs.</li> <li>- Absence of this service</li> </ul>      | <ul style="list-style-type: none"> <li>-Fatigue level: fatigue severity scale (FSS).</li> <li>- Capacity for activities of daily living:</li> <li>- Barthel index.</li> <li>- QOL quality of life</li> </ul> |

|                    |     |          |                                     |                              |                                                                                                                                                                                                                                                                                                                                                                                              |                                                                                                                                                                                                                                           |                                                                                                                                                                                                                                                                                                                                                                                                                                                                                                                                                                                                                                                                                  |
|--------------------|-----|----------|-------------------------------------|------------------------------|----------------------------------------------------------------------------------------------------------------------------------------------------------------------------------------------------------------------------------------------------------------------------------------------------------------------------------------------------------------------------------------------|-------------------------------------------------------------------------------------------------------------------------------------------------------------------------------------------------------------------------------------------|----------------------------------------------------------------------------------------------------------------------------------------------------------------------------------------------------------------------------------------------------------------------------------------------------------------------------------------------------------------------------------------------------------------------------------------------------------------------------------------------------------------------------------------------------------------------------------------------------------------------------------------------------------------------------------|
| Nguyen et al. 2009 | USA | 6 months | 17 Trained<br>Assig.: 9<br>Monit.:8 | Randomized exploratory study | <ul style="list-style-type: none"> <li>- Patients with COPD.</li> <li>- Severe condition according to GOLD criteria.</li> <li>- FEV1/FVC&lt;70%</li> <li>- FEV1% &lt; 80%</li> <li>- Patients receiving supplemental oxygen were acceptable if their O2 saturation was maintained at 88% on 6 L/min nasal oxygen during six-minute walk test (6MW);</li> <li>- Age &gt; 40 years.</li> </ul> | <ul style="list-style-type: none"> <li>- Exercise via mobile (Long-term exercise support mobilization) alone vs.</li> <li>- Exercising using a mobile phone (Support mobilization for long-term exercise) with help of a nurse</li> </ul> | <ul style="list-style-type: none"> <li>- For exercise regulation: Self-Regulation Questionnaire-Exercise [SRQ-E]) and Patient Activation Measure (PAM).</li> <li>- Self-efficacy to overcome of barriers to exercise: <ul style="list-style-type: none"> <li>- Barrier effectiveness scale.</li> <li>- General perception of support for exercise: Likert scale</li> </ul> </li> <li>- Functional capacity: 6-minute walk test (6MWT).</li> <li>- Free-living ambulatory physical activity using a Stepwatch activity (buckled to ankle).</li> <li>- Health-related quality of life (HRQoL)</li> <li>- Quality of life: Saint George respiratory questionnaire (SGRQ)</li> </ul> |
|--------------------|-----|----------|-------------------------------------|------------------------------|----------------------------------------------------------------------------------------------------------------------------------------------------------------------------------------------------------------------------------------------------------------------------------------------------------------------------------------------------------------------------------------------|-------------------------------------------------------------------------------------------------------------------------------------------------------------------------------------------------------------------------------------------|----------------------------------------------------------------------------------------------------------------------------------------------------------------------------------------------------------------------------------------------------------------------------------------------------------------------------------------------------------------------------------------------------------------------------------------------------------------------------------------------------------------------------------------------------------------------------------------------------------------------------------------------------------------------------------|

|                                   |        |                  |                        |                             |                                                                                                                                                            |                                                                                                           |                                                                                                                                                                                                                                                                                                                                                                                     |
|-----------------------------------|--------|------------------|------------------------|-----------------------------|------------------------------------------------------------------------------------------------------------------------------------------------------------|-----------------------------------------------------------------------------------------------------------|-------------------------------------------------------------------------------------------------------------------------------------------------------------------------------------------------------------------------------------------------------------------------------------------------------------------------------------------------------------------------------------|
| <b>Padilla-Zárate et al. 2013</b> | Mexico | 1 year           | 60<br>GI: 35<br>GC: 25 | Randomized controlled trial | -Patients with COPD, -GOLD I, II, III or IV                                                                                                                | - Medical care and IEBCP (nursing-intervention based on personalized counseling) vs.<br>- Medical care    | - Self-care.<br>- Quality of life: St. George respiratory questionnaire and quality of life questionnaire in respiratory disease (CQR).<br>- Oximetry: oximeter.<br>- Relationship between expired volume maximum in first second of forced expiration and forced vital capacity: spirometer.<br>- Dyspnea: Medical Research Council dyspnea scale.<br>- Adherence to intervention. |
| <b>Saleh et al. 2014</b>          | Norway | 1 year 2010-2011 | 56                     | Retrospective cohort study  | - Patients with COPD<br>- Age> 40 years<br>- Not having other serious illnesses with a life expectancy of less than 12 months.<br>- Ability to communicate | - Impact of use of video consultations on hospital readmission for exacerbations and patient satisfaction | - Number of re-admissions due to exacerbations<br>- Frequency and duration of these hospitalizations<br>- Patient satisfaction                                                                                                                                                                                                                                                      |

|                               |           |                  |                        |                             |                                                                                                                                                                                                                                                                                                                                                                                                  |                                                                                                                                                                                                                                                                                                                                                                                                              |                                                                                                                                                                                                                                                                                                                                                                                                                                                                                                                                   |
|-------------------------------|-----------|------------------|------------------------|-----------------------------|--------------------------------------------------------------------------------------------------------------------------------------------------------------------------------------------------------------------------------------------------------------------------------------------------------------------------------------------------------------------------------------------------|--------------------------------------------------------------------------------------------------------------------------------------------------------------------------------------------------------------------------------------------------------------------------------------------------------------------------------------------------------------------------------------------------------------|-----------------------------------------------------------------------------------------------------------------------------------------------------------------------------------------------------------------------------------------------------------------------------------------------------------------------------------------------------------------------------------------------------------------------------------------------------------------------------------------------------------------------------------|
| <b>Scheerens et al. 2020</b>  | Belgium   | 6 months         | 25<br>GI: 13<br>GC: 12 | Randomized controlled trial | <ul style="list-style-type: none"> <li>- Patients with COPD</li> <li>- Oxygen dependent.</li> <li>- Three or more hospitalizations for COPD in last three years</li> <li>- CAT scale</li> <li>- Scale 4 dyspnea according to MRC.</li> <li>- Intubation in last year</li> <li>- Non-invasive ventilation in last year</li> <li>- BMI = 18</li> <li>- NYHA functional classification 3</li> </ul> | <ul style="list-style-type: none"> <li>- Integrated palliative home care (COPD pre-inclusion support training, monthly visits, brochures on coping mechanisms, a protocol on symptom management and support, action plan and care plan, integration of project and care through complaint and communication mechanisms)</li> </ul> <p>vs.</p> <ul style="list-style-type: none"> <li>- Usual care</li> </ul> | <ul style="list-style-type: none"> <li>-Health-related quality of life: HRQOL</li> <li>-Mood and anxiety: Hospital Anxiety and Depression Scale (HADS)</li> <li>- Impact of COPD on quality of life: CAT</li> <li>- Number of exacerbations, primary care interventions, hospitalizations and living will decisions, measured with patient-reported Health records.</li> <li>- Evaluation of care received: Dutch Patient Assessment of Chronic Illness Care (PACIC)</li> <li>- Place of death: medical care involved.</li> </ul> |
| <b>Shany et al. 2017 (37)</b> | Australia | 1 year 2009-2010 | 29<br>GI:11<br>GC:18   | Randomized controlled trial | <ul style="list-style-type: none"> <li>- Patients with COPD</li> <li>- Sydney resident patients treated by Blacktown Hospital.</li> <li>- At least one hospital admission for a COPD exacerbation in previous year</li> </ul>                                                                                                                                                                    | <ul style="list-style-type: none"> <li>- Monitoring of oximetry, temperature, pulse, electrocardiogram, blood pressure, spirometry and weight with telephone support and home visits</li> </ul> <p>vs.</p>                                                                                                                                                                                                   | <ul style="list-style-type: none"> <li>- Quality of life: Saint George Respiratory questionnaire (SGRQ)</li> <li>- Mood and anxiety: Hospital Anxiety and Depression Scale (HADS)</li> <li>- Number of hospital admissions and length of stay.</li> </ul>                                                                                                                                                                                                                                                                         |



|                             |         |                     |                          |                             |                                                                                                                                                                                                                            |                                                                                                                                                                                                          |                                                                                                                                                                                                 |
|-----------------------------|---------|---------------------|--------------------------|-----------------------------|----------------------------------------------------------------------------------------------------------------------------------------------------------------------------------------------------------------------------|----------------------------------------------------------------------------------------------------------------------------------------------------------------------------------------------------------|-------------------------------------------------------------------------------------------------------------------------------------------------------------------------------------------------|
|                             |         |                     |                          |                             |                                                                                                                                                                                                                            | - Only telephone support and home visits                                                                                                                                                                 |                                                                                                                                                                                                 |
| <b>Sorknæs et al. 2011</b>  | Denmark | 1 year<br>2008-2009 | 100<br>GI:50<br>GC:50    | Randomized controlled trial | - Patients with COPD<br>- Exacerbations with dyspnea, cough and/or sputum.<br>- Need to increased medication.                                                                                                              | - Use of tele-consultations between COPD patients and respiratory nurses                                                                                                                                 | - Health-related quality of life: EQ- 5D<br>- Body mass index: BMI<br>- Dyspnea: MRC<br>- FEV1/FVC, FVC and FEV1: spirometry                                                                    |
| <b>Sorknaes et al. 2013</b> | Denmark | 1 year              | 242<br>GI: 121<br>GC:121 | Randomized controlled trial | - Patients with COPD by spirometry FEV1/FVC <70%<br>- Admitted with exacerbations (defined by increased need for medication and increased dyspnea, increased volume of expectoration or increased cough)<br>- Age<40 years | - Daily teleconsultations in real time for one week between hospital nurses specialized in respiratory diseases and patients with severe COPD discharged after an acute exacerbation vs.<br>- Usual care | - Re-admissions to hospital<br>- Length of hospital stay<br>- Body mass index<br>- Dyspnea: MRC<br>- Spirometry<br>- Spanish health questionnaire: SF-36<br>- Need for home care<br>- Mortality |

|                              |         |             |                       |                                          |                                                                                                                                                                                                                                                                                          |                                                                                                                                                                                  |                                                                                                                                                                                                                                                                                                          |
|------------------------------|---------|-------------|-----------------------|------------------------------------------|------------------------------------------------------------------------------------------------------------------------------------------------------------------------------------------------------------------------------------------------------------------------------------------|----------------------------------------------------------------------------------------------------------------------------------------------------------------------------------|----------------------------------------------------------------------------------------------------------------------------------------------------------------------------------------------------------------------------------------------------------------------------------------------------------|
| <b>Utens et al.<br/>2012</b> | Holland | 3<br>months | 125<br>GI:63<br>GC:52 | Randomized<br>controlled<br>trial        | <ul style="list-style-type: none"> <li>- Patients with COPD</li> <li>- Minimum GOLD I</li> <li>- 10 packs smoked per year</li> <li>- Hospitalized for exacerbations.</li> <li>- Age &lt; 40 years</li> </ul>                                                                             | <ul style="list-style-type: none"> <li>- Discharge assisted by community nurses (after hospitalization for exacerbations)</li> <li>vs.</li> <li>- Usual hospital care</li> </ul> | <ul style="list-style-type: none"> <li>- Change in health status: Clinical COPD Questionnaire (CCQ).</li> <li>- Health-related quality of life: HRQL</li> <li>- Mortality</li> <li>- Readmissions</li> <li>- Treatment failures</li> </ul>                                                               |
| <b>Utens et al.<br/>2014</b> | Holland | 3<br>months | 125<br>GI:63<br>GC:52 | Randomized<br>controlled<br>trial        | <ul style="list-style-type: none"> <li>- Patients with COPD</li> <li>- Age &lt; 40 years</li> <li>- Hospitalized for exacerbations</li> </ul>                                                                                                                                            | <ul style="list-style-type: none"> <li>- Hospital care at home</li> <li>vs.</li> <li>- Usual hospital care</li> </ul>                                                            | <ul style="list-style-type: none"> <li>- Change in health status: Clinical COPD Questionnaire (CCQ).</li> <li>- Caregiver stress: Caregiver Stress Index (CSI).</li> <li>- Caregiver satisfaction: a series of questions</li> <li>- Preference of users</li> </ul>                                       |
| <b>Wang et al.<br/>2014</b>  | China   | 3<br>months | 88<br>GI:42<br>GC:46  | RCT<br>Randomized<br>controlled<br>trial | <ul style="list-style-type: none"> <li>- Patients with COPD</li> <li>- Age &lt; 45 years</li> <li>- FEV1 /FVC: 70%</li> <li>- FEV1 between 30-80%</li> <li>- Not participating in any other research or habilitation program.</li> <li>- Being able to communicate in Chinese</li> </ul> | <ul style="list-style-type: none"> <li>- Model of beliefs in health after hospitalization</li> <li>vs.</li> <li>- Routine nursing care</li> </ul>                                | <ul style="list-style-type: none"> <li>- Dyspnea: MRC</li> <li>- Ability to perform basic activities of daily life: Barthel.</li> <li>- Pulmonary functions: FEV1 and FVC</li> <li>- Exercise Tolerance: 6MWT</li> <li>- Self-efficacy of patients with COPD: COPD Self-Efficacy Scale (CSES)</li> </ul> |

|                               |           |                          |                         |                                   |                                                                                                                                                                                      |                                                                                                                 |                                                                                                                                                                                                                                                                                                 |
|-------------------------------|-----------|--------------------------|-------------------------|-----------------------------------|--------------------------------------------------------------------------------------------------------------------------------------------------------------------------------------|-----------------------------------------------------------------------------------------------------------------|-------------------------------------------------------------------------------------------------------------------------------------------------------------------------------------------------------------------------------------------------------------------------------------------------|
| <b>Wang et al. 2018</b>       | China     | 1 year<br>2016 -<br>2017 | 120<br>GI: 60<br>GC: 60 | Randomized<br>controlled<br>trial | - Patients diagnosed<br>with COPD.                                                                                                                                                   | - Humanistic<br>nursing care<br>vs.<br>- Regular nursing<br>care                                                | - Degree of anxiety and<br>depression:<br>- Zung Self-Assessment Scale<br>for Depression (SDS) and<br>Zung Self-Assessment<br>Anxiety Scale (EAA)<br>- Pulmonary function: FVC,<br>MMF and FEV1.<br>- Nursing degree of<br>satisfaction: self-designed<br>questionnaire                         |
| <b>Wang et al. 2020</b>       | China     | 1 year                   | 154<br>GI:77<br>GC:77   | Randomized<br>controlled<br>trial | - Patients with COPD<br>- GOLD and II, III or<br>IV<br>- Patients hospitalized<br>for acute exacerbation<br>of COPD                                                                  | - Nurse-led self-<br>management<br>program<br>vs.<br>- Usual care                                               | - Exercise Tolerance: 6MWT<br>- Number of hospitalizations,<br>length of stay and visits to<br>emergency ward.<br>- Quality of life: Saint George<br>respiratory questionnaire<br>(SGRQ)<br>- Patient satisfaction: COPD<br>Transitional-Care Patient<br>Satisfaction Questionnaire<br>(CTCPSQ) |
| <b>Wood-Baker et al. 2012</b> | Australia | 12<br>months             | 69<br>GI: 36<br>GC:33   | Randomized<br>controlled<br>trial | - Patients with COPD<br>- Patients with acute<br>exacerbation<br>- Living in designated<br>areas<br>- Age > 45 years.<br>- History of smoking.<br>10 pack-years.<br>- FEV1 /FVC: 0.7 | - Program to<br>increase self-care<br>behaviors taught by<br>community health<br>nurses<br>vs.<br>- Usual care. | - Health-related quality of<br>life: SF-36<br>- Patient self-efficacy:<br>Stanford Self-Efficacy scale<br>- Number of medications at<br>discharge and comorbidity:<br>geriatric index of<br>comorbidity.<br>-Weight.                                                                            |

|                              |        |                     |                        |                             |                                                                                                                                                                      |                                                                                               |                                                                                                                                |
|------------------------------|--------|---------------------|------------------------|-----------------------------|----------------------------------------------------------------------------------------------------------------------------------------------------------------------|-----------------------------------------------------------------------------------------------|--------------------------------------------------------------------------------------------------------------------------------|
|                              |        |                     |                        |                             | - At least one COPD exacerbation in previous 12 months<br>- Meeting requirements of study (Mini-Mental score greater than 21)<br>- Access to computer and telephone. |                                                                                               |                                                                                                                                |
| <b>Yu et al. 2014</b>        | China  | 1 year<br>2011-2012 | 84<br>GI: 42<br>GC: 42 | Quasi-experimental study    | - Patients with COPD<br>- FEV1 <70%<br>- Age > 40 years<br>- Able to read and write Chinese<br>- Lucid and oriented<br>- Able to use phone                           | - Self-management of education vs.<br>- Usual care without additional education               | - Quality of life: Saint George Respiratory questionnaire (SGRQ)                                                               |
| <b>Zakrisson et al. 2016</b> | Sweden | 3 years             | 64<br>GI:40<br>GC:24   | Quasi-experimental study    | - Patients with COPD<br>- GOLD II, III<br>- Age 60-75 years                                                                                                          | - Training at home by a nurse to quit smoking vs<br>- Usual care without additional education | - Exercise Tolerance: 6MWT<br>- Quality of life: Saint George respiratory questionnaire (SGRQ)<br>- No COPD exacerbations      |
| <b>Zakrisson et al. 2020</b> | Sweden | 1 year<br>2015-2016 | 202<br>GI:94<br>GC:108 | Randomized controlled trial | - Patients with COPD                                                                                                                                                 | - Usual care + informative self-management support vs.<br>- Usual care only                   | - Quality of care: Patient's Perspective questionnaire (QPP)<br>- Impact of COPD on patient's life: COPD Assessment Test (CAT) |

---

### HAD Anxiety

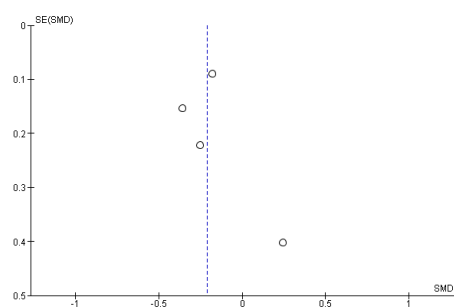

### Barthel Score

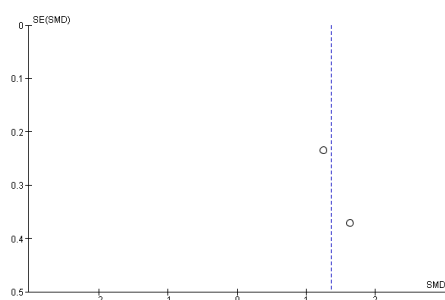

### 6 MWT Test

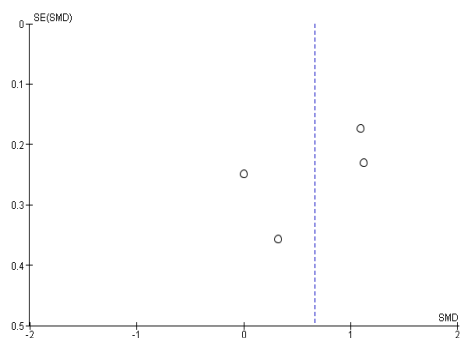

**Figure S1.** Assessment of publication bias. Funnel Plots.

|                            | Random sequence generation (selection bias) | Blinding of participants and personnel (performance bias) | Blinding of outcome assessment (selection bias) | Incomplete outcome data (attrition bias) | Selective reporting (reporting bias) | Allocation concealment (selection bias) | Other bias |
|----------------------------|---------------------------------------------|-----------------------------------------------------------|-------------------------------------------------|------------------------------------------|--------------------------------------|-----------------------------------------|------------|
| Abad-Corpa et al 2013      | ●                                           | ●                                                         | ●                                               | ●                                        | ●                                    | ●                                       | ●          |
| Ahn et al 2020             | ?                                           | ?                                                         | ?                                               | ●                                        | ●                                    | ●                                       | ?          |
| Akinci et al 2011          | ●                                           | ●                                                         | ●                                               | ●                                        | ●                                    | ●                                       | ●          |
| Al-Kalaldeh et al 2016     | ?                                           | ?                                                         | ?                                               | ●                                        | ●                                    | ●                                       | ?          |
| Ansari et al 2020          | ?                                           | ?                                                         | ?                                               | ●                                        | ●                                    | ●                                       | ?          |
| Bal Ozpaptan et al 2016    | ●                                           | ●                                                         | ●                                               | ●                                        | ●                                    | ●                                       | ●          |
| Benzo et al 2019           | ●                                           | ●                                                         | ●                                               | ●                                        | ●                                    | ●                                       | ●          |
| Billington et al 2015      | ●                                           | ●                                                         | ●                                               | ●                                        | ●                                    | ●                                       | ●          |
| Bischoff et al 2012        | ●                                           | ●                                                         | ●                                               | ●                                        | ●                                    | ●                                       | ●          |
| Cai et al 2020             | ●                                           | ●                                                         | ●                                               | ●                                        | ●                                    | ●                                       | ●          |
| Cameron-Tucker et al 2016  | ●                                           | ●                                                         | ●                                               | ●                                        | ●                                    | ●                                       | ●          |
| Chau et al 2012            | ●                                           | ●                                                         | ●                                               | ●                                        | ●                                    | ●                                       | ●          |
| Cumming et al 2010         | ●                                           | ●                                                         | ●                                               | ●                                        | ●                                    | ●                                       | ●          |
| Deng et al 2013            | ●                                           | ●                                                         | ●                                               | ●                                        | ●                                    | ●                                       | ●          |
| De San Miguel et al 2013   | ●                                           | ●                                                         | ●                                               | ●                                        | ●                                    | ●                                       | ●          |
| Dogan et al 2017           | ●                                           | ●                                                         | ●                                               | ●                                        | ●                                    | ●                                       | ●          |
| Early et al 2017           | ●                                           | ●                                                         | ●                                               | ●                                        | ●                                    | ●                                       | ●          |
| Efil et al 2020            | ●                                           | ●                                                         | ●                                               | ●                                        | ●                                    | ●                                       | ●          |
| Heslop-Marshall et al 2018 | ●                                           | ●                                                         | ●                                               | ●                                        | ●                                    | ●                                       | ●          |
| Ingadottir et al 2010      | ?                                           | ?                                                         | ?                                               | ●                                        | ●                                    | ●                                       | ?          |
| Iniesta Sánchez et al 2016 | ●                                           | ●                                                         | ●                                               | ●                                        | ●                                    | ●                                       | ●          |
| Jolly et al 2018           | ●                                           | ●                                                         | ●                                               | ●                                        | ●                                    | ●                                       | ●          |
| Jurado-Gamez et al 2013    | ●                                           | ●                                                         | ●                                               | ●                                        | ●                                    | ●                                       | ●          |
| Karasu et al 2020          | ●                                           | ●                                                         | ●                                               | ●                                        | ●                                    | ●                                       | ●          |
| Khoshkesht et al 2015      | ●                                           | ●                                                         | ●                                               | ●                                        | ●                                    | ●                                       | ●          |
| Lamers et al 2010          | ●                                           | ●                                                         | ●                                               | ●                                        | ●                                    | ●                                       | ●          |
| Lavesen et al 2016         | ●                                           | ●                                                         | ●                                               | ●                                        | ●                                    | ●                                       | ●          |
| Lee et al 2015             | ●                                           | ●                                                         | ●                                               | ●                                        | ●                                    | ●                                       | ●          |
| Li et al 2014              | ●                                           | ●                                                         | ●                                               | ●                                        | ●                                    | ●                                       | ●          |
| Li et al 2015              | ●                                           | ●                                                         | ●                                               | ●                                        | ●                                    | ●                                       | ●          |
| Li et al 2020              | ●                                           | ●                                                         | ●                                               | ●                                        | ●                                    | ●                                       | ●          |
| Mohammadi et al 2015       | ●                                           | ●                                                         | ●                                               | ●                                        | ●                                    | ●                                       | ●          |
| Nguyen et al 2009          | ●                                           | ●                                                         | ●                                               | ●                                        | ●                                    | ●                                       | ●          |
| Padilla-Zarate et al 2013  | ●                                           | ●                                                         | ●                                               | ●                                        | ●                                    | ●                                       | ●          |
| Saleh et al 2014           | ?                                           | ?                                                         | ?                                               | ●                                        | ●                                    | ●                                       | ?          |
| Scheerens et al 2020       | ●                                           | ●                                                         | ●                                               | ●                                        | ●                                    | ●                                       | ●          |
| Shany et al 2017           | ●                                           | ●                                                         | ●                                               | ●                                        | ●                                    | ●                                       | ●          |
| Sorknaes et al 2011        | ●                                           | ●                                                         | ●                                               | ●                                        | ●                                    | ●                                       | ●          |
| Sorknaes et al 2013        | ●                                           | ●                                                         | ●                                               | ●                                        | ●                                    | ●                                       | ●          |
| Utens et al 2012           | ●                                           | ●                                                         | ●                                               | ●                                        | ●                                    | ●                                       | ●          |
| Utens et al 2014           | ●                                           | ●                                                         | ●                                               | ●                                        | ●                                    | ●                                       | ●          |
| Wang et al 2014            | ●                                           | ●                                                         | ●                                               | ●                                        | ●                                    | ●                                       | ●          |
| Wang et al 2018            | ●                                           | ●                                                         | ●                                               | ●                                        | ●                                    | ●                                       | ●          |
| Wang et al 2020            | ●                                           | ●                                                         | ●                                               | ●                                        | ●                                    | ●                                       | ●          |
| Wood-Baker et al 2012      | ●                                           | ●                                                         | ●                                               | ●                                        | ●                                    | ●                                       | ●          |
| Yu et al 2014              | ●                                           | ●                                                         | ●                                               | ●                                        | ●                                    | ●                                       | ●          |
| Zakrisson et al 2016       | ●                                           | ●                                                         | ●                                               | ●                                        | ●                                    | ●                                       | ●          |
| Zakrisson et al 2020       | ●                                           | ●                                                         | ●                                               | ●                                        | ●                                    | ●                                       | ●          |

**Figure S2.** Risk of bias of all selected studies.
